# Supplementary material for: Photoluminescence of self-assembled Ag(i) and Au(i) N-heterocyclic carbene complexes. Interplay the aurophilic, hydrogen bonding and hydrophobic interactions
Source: Royal Society of Chemistry journal article supplement (doi:10.1039/c6ra28294f), 2017-01-01
Supplement: c6ra28294f1.pdf [file c6ra28294f1.pdf]

## Electronic Supplementary Information

### Photoluminescence of Self-assembled Ag(I) and Au(I) N-heterocyclic Carbene Complexes. Interplay the aurophilic, hydrogen bonding and hydrophobic interactions.

Herbert J. H.Syu,\* Josh Y. Z. Chiou, Ju-Chun Wang and Ivan J. B. Lin

Department of Chemistry, National Dong Hwa University, Shoufeng, Hualien 974, Taiwan E-mail:d9812001@mail.ndhu.edu.tw; Fax: +886-3-863-3570

#### Experimental Section.

NMR spectra were recorded on AvanceII spectrometer spectrometer ( $^1\text{H}$ , 400 MHz;  $^{13}\text{C}$ , 100 MHz). The solvents and reagents were purchased from Aldrich Acros and used as received. Elemental microanalyses were performed by the Taiwan Instrumentation Center. IR spectra were recorded with a Perkin-Elmer Spectrum One. Raman spectra were measured using a Jobin Yvon 64000 Raman microscope (HORIBA, Minami-ku, Kyoto, Japan) equipped with a Linkam optical DSC system (THMS600; Linkam Scientific Instruments, Surrey, UK). Optical characterization was performed on an Olympus BH-2 polarizing microscope equipped with a Mettler FP 82 hot stage and a Mettler FP 90 central processor. Differential scanning calorimetry (DSC) was performed by using a Perkin-Elmer DSC-10 calorimeter under flowing  $\text{N}_2$ . The powder X-ray diffraction data was collected by National Dong Hwa University with  $\text{Cu K}\alpha$  radiation (XRD D8 Advanced, Bruker). Emission spectra were recorded on an Edinburgh FLSP-920 fluorescence spectrophotometer. Emission lifetime measurements were performed by a time-correlated single-photon counting method (TCSPC) with an Edinburgh FLSP-920 fluorescence spectrophotometer. The decay signal was recorded by a R955 PMT (Hamamatsu). Single crystal X-ray diffraction data were collected on a Bruker SMART diffractometer equipped with a CCD array detector with graphite monochromatized  $\text{Mo-K}\alpha$  radiation ( $\lambda = 0.71073 \text{ \AA}$ ) in  $\phi$  and  $\omega$  scan modes.

**[C<sub>16</sub>,C<sub>16</sub>(2-OH)-imH][BF<sub>4</sub>] and [C<sub>16</sub>,C<sub>16</sub>(2-OH)-imH][PF<sub>6</sub>]**

[C<sub>16</sub>,C<sub>16</sub>(2-OH)-imH][BF<sub>4</sub>] and [C<sub>16</sub>,C<sub>16</sub>(2-OH)-imH][PF<sub>6</sub>] were prepared by anion metathesis of [C<sub>16</sub>,C<sub>16</sub>(2-OH)-imH][Cl] salts (200 mg, 0.35 mmol) in 10 mL EtOH-H<sub>2</sub>O (80:20 v/v) solvent

system using corresponding ammonium salts (0.35 mmol). After 2 hours the precipitate was filtered and washed with 10 mL EtOH-H<sub>2</sub>O (20 : 80 v/v) to afford the white solid product.

#### **[C<sub>16</sub>,C<sub>16</sub>(2-OH)-imH][BF<sub>4</sub>]**

White solid, 207 mg, 0.33 mmol, 94 % yield.

<sup>1</sup>H-NMR (400 MHz, CDCl<sub>3</sub>): δ = 0.88 (t, <sup>3</sup>J = 7 Hz, 6H), 1.24-1.46 (m, 52H), 1.86 (m, 2H), 3.35 (b, 1H), 3.87 (m, 1H), 4.07 (m, 1H), 4.16 (m, 2H), 4.28 (m, 1H), 7.24 (s, 1H), 7.37 (s, 1H), 8.78 (s, 1H). <sup>13</sup>C-NMR (100 MHz, CDCl<sub>3</sub>): δ = 14.15, 22.72, 25.50, 26.28, 29.58, 31.95, 34.24, 50.15, 55.54, 69.81, 121.41, 123.27, 136.21. <sup>19</sup>F-NMR (376.5 MHz, CDCl<sub>3</sub>): δ = -150.80 (<sup>10</sup>BF<sub>4</sub>) and -150.85 (<sup>11</sup>BF<sub>4</sub>). Anal. Calcd. for C<sub>35</sub>H<sub>69</sub>N<sub>2</sub>OBF<sub>4</sub>: C 67.72, H 11.20, N 4.51. Found: C 67.72, H 11.05, N 4.50 %.

#### **[C<sub>16</sub>,C<sub>16</sub>(2-OH)-imH][PF<sub>6</sub>]**

White solid, 224 mg, 0.33 mmol, 94 % yield.

<sup>1</sup>H-NMR (400 MHz, CDCl<sub>3</sub>): δ = 0.88 (t, <sup>3</sup>J = 7 Hz, 6H), 1.26-1.67 (m, 52H), 1.87 (m, 2H), 2.57 (b, 1H), 3.92 (m, 1H), 4.02 (m, 1H), 4.14 (m, 2H), 4.26 (m, 1H), 7.24 (s, 1H), 7.37 (s, 1H), 8.78 (s, 1H). <sup>13</sup>C-NMR (100 MHz, CDCl<sub>3</sub>): δ = 14.03, 22.64, 25.29, 26.21, 29.52, 31.90, 34.28, 50.20, 55.47, 69.98, 121.49, 123.37, 135.75. <sup>19</sup>F-NMR (376.5 MHz, CDCl<sub>3</sub>): δ = -72.08 (d, <sup>1</sup>J<sub>PF</sub> = 760 Hz). <sup>31</sup>P-NMR (162 MHz, CDCl<sub>3</sub>): δ = -144.35 (septet, <sup>1</sup>J<sub>PF</sub> = 760 Hz). Anal. Calcd. for C<sub>35</sub>H<sub>69</sub>N<sub>2</sub>OPF<sub>6</sub>: C 61.92, H 10.24, N 4.13. Found: C 61.52, H 9.89, N 3.77 %.

#### **[Ag(C<sub>16</sub>,C<sub>16</sub>(2-OH)-imy)<sub>2</sub>][Ag<sub>2</sub>Cl<sub>4</sub>] (1)**

[C<sub>16</sub>,C<sub>16</sub>(2-OH)-im][Cl] (200 mg, 0.35 mmol) was reacted with silver(I) oxide (0.17 mg, 40 μmol) in CH<sub>2</sub>Cl<sub>2</sub> at room temperature for 24 h and the reaction was performed in the dark. Added activated carbon when the reaction is finished. Filtration over celite followed by removal of the solvent from the filtrate gave the crude product. The product as a white solid powder is obtained followed by recrystallization with CH<sub>2</sub>Cl<sub>2</sub>/hexane (95 mg, 0.14 mmol, 40 % yield). <sup>1</sup>H-NMR (400 MHz, *d*<sup>6</sup>-DMSO): δ = 0.84 (t, <sup>3</sup>J = 7 Hz, 6H), 1.22 (m, 52H), 1.76 (m, 2H), 3.76 (m, 1H), 4.00 (m, 1H), 4.07 (m, 2H), 4.89 (m, 1H), 7.38 (s, 1H), 7.42 (s, 1H). <sup>13</sup>C-NMR (100 MHz, *d*<sup>6</sup>-DMSO): δ = 14.33, 22.51, 25.44, 26.24, 29.14, 29.50, 31.30, 31.74, 34.67, 51.35, 57.42, 70.24, 121.73, 123.23, 178.87. Anal. Calcd. for C<sub>35</sub>H<sub>69</sub>N<sub>2</sub>OAgCl: C 62.07, H 10.27, N 4.14. Found: C 62.53, H 10.00, N

3.78 %.

**[Au(C<sub>16</sub>,C<sub>16</sub>(2-OH)-imy)Cl] (2)**

[Au(SMe<sub>2</sub>)Cl] (55 mg, 0.19 mmol) in CH<sub>2</sub>Cl<sub>2</sub> (20 mL) was added to a CH<sub>2</sub>Cl<sub>2</sub> (20 mL) solution of [Ag(C<sub>16</sub>,C<sub>16</sub>(2-OH)-imy)<sub>2</sub>][Ag<sub>2</sub>Cl<sub>4</sub>] (120 mg, 0.18 mmol) and stir for 2 h. Filtration over celite followed by removal of the solvent from the filtrate gave the crude product. The white solid product were obtained by recrystallized with CH<sub>2</sub>Cl<sub>2</sub>/hexane (102 mg, 0.13 mmol, 74 % yield). <sup>1</sup>H-NMR (400 MHz, *d*<sup>6</sup>-DMSO): δ = 0.84 (t, <sup>3</sup>J = 7 Hz, 6H), 1.22-1.38 (m, 52H), 1.78 (m, 2H), 3.84 (m, 1H), 4.01 (m, 1H), 4.08 (m, 2H), 4.96 (m, 1H), 7.37 (s, 1H), 7.43 (s, 1H). <sup>13</sup>C-NMR (100 MHz, *d*<sup>6</sup>-DMSO): δ = 14.38, 22.55, 25.36, 26.02, 29.28, 30.75, 31.76, 34.54, 50.71, 56.64, 69.86, 121.39, 123.08, 168.91. Anal. Calcd. for C<sub>35</sub>H<sub>69</sub>N<sub>2</sub>OAuCl: C 54.85, H 9.08, N 3.66. Found: C 54.87, H 8.88, N 3.52 %.

Preparation of **2** as thin film

[Au(C<sub>16</sub>,C<sub>16</sub>(2-OH)-imy)Cl] (20 mg) was dissolved in 5 mL CH<sub>2</sub>Cl<sub>2</sub>. This solution was used to prepare the thin film sample via drop casting method.

**[Au(C<sub>16</sub>,C<sub>16</sub>(2-OH)-imy)<sub>2</sub>][BF<sub>4</sub>] (3)**

K<sub>2</sub>CO<sub>3</sub> (13 mg, 0.9 mmol) was added to the mixture of [C<sub>16</sub>,C<sub>16</sub>(2-OH)-im][BF<sub>4</sub>] (43 mg, 0.07 mmol) and [Au(C<sub>16</sub>,C<sub>16</sub>(2-OH)-imy)Cl] (50 mg, 0.07 mmol) in acetone (30 ml). The mixture was stirred for 24 h. The solvent was removed under reduced pressure. Dichloromethane (10 ml) was added to the residue and filtered through celite. The solvent was concentrated by rotary evaporator under vacuum. Ethylacetate (20 mL) was then added to the concentrated filtrate to give a white product (62 mg, 0.05 mmol, 70 % yield). <sup>1</sup>H-NMR (600 MHz, CDCl<sub>3</sub>): δ = 0.87 (t, <sup>3</sup>J = 7 Hz, 12H), 1.24-1.52 (m, 104H), 1.87 (m, 4H), 3.98 (m, 1H), 3.99 (m, 1H), 4.21 (m, 8H), 4.88 (b, 2H), 6.98 (d, 2H), 7.23 (dd, 2H). <sup>13</sup>C-NMR (100 MHz, CDCl<sub>3</sub>): δ = 14.13, 22.71, 25.89, 26.73, 29.59, 31.38, 31.95, 34.56, 51.39, 57.68, 70.87, 120.62, 122.86, 184.08. <sup>19</sup>F-NMR (376.5 MHz, CDCl<sub>3</sub>): δ = -152.53 (<sup>10</sup>BF<sub>4</sub>) and -152.58 (<sup>11</sup>BF<sub>4</sub>). Anal. Calcd. for C<sub>70</sub>H<sub>138</sub>N<sub>4</sub>O<sub>2</sub>AuBF<sub>4</sub> · H<sub>2</sub>O: C 61.38, H 10.30, N 4.09. Found: C 61.65, H 10.12, N 3.67 %.

**[Au(C<sub>16</sub>,C<sub>16</sub>(2-OH)-imy)<sub>2</sub>][PF<sub>6</sub>] (4)**

$K_2CO_3$  (13 mg, 0.9 mmol) was added to the mixture of  $[C_{16},C_{16}(2-OH)-im][PF_6]$  (47 mg, 0.07 mmol) and  $[Au(C_{16},C_{16}(2-OH)-imy)Cl]$  (50 mg, 0.07 mmol) in acetone (30 ml). The mixture was stirred for 24 h. The solvent was removed under reduced pressure. Dichloromethane (10 ml) was added to the residue and filtered through celite. The solvent was concentrated by rotary evaporator under vacuum. Ethylacetate (20 mL) was then added to the concentrated filtrate to give a white product (68 mg, 0.05 mmol, 74 % yield).  $^1H$ -NMR (400 MHz,  $CDCl_3$ ):  $\delta$  = 0.89 (t,  $^3J$  = 7 Hz, 12H), 1.24-1.66 (m, 104H), 1.86 (m, 4H), 3.04 (b, 1H), 3.23 (b, 1H), 3.92 (m, 1H), 3.98 (m, 1H), 4.15 (m, 8H), 7.03 (m, 2H), 7.14 (dd, 2H).  $^{13}C$ -NMR (100 MHz,  $CDCl_3$ ):  $\delta$  = 14.16, 22.72, 25.73, 26.72, 29.51, 31.42, 31.96, 34.43, 51.41, 57.59, 71.46, 121.20, 122.46, 183.88.  $^{19}F$ -NMR (376.5 MHz,  $CDCl_3$ ):  $\delta$  = -73.05 (d,  $^1J_{PF}$  = 760 Hz).  $^{31}P$ -NMR (162 MHz,  $CDCl_3$ ):  $\delta$  = -144.39 (septet,  $^1J_{PF}$  = 760 Hz). Anal. Calcd. for  $C_{70}H_{138}N_4O_2AuPF_6$ : C 59.64, H 9.87, N 3.97. Found: C 59.58, H 9.85, N 3.49 %.

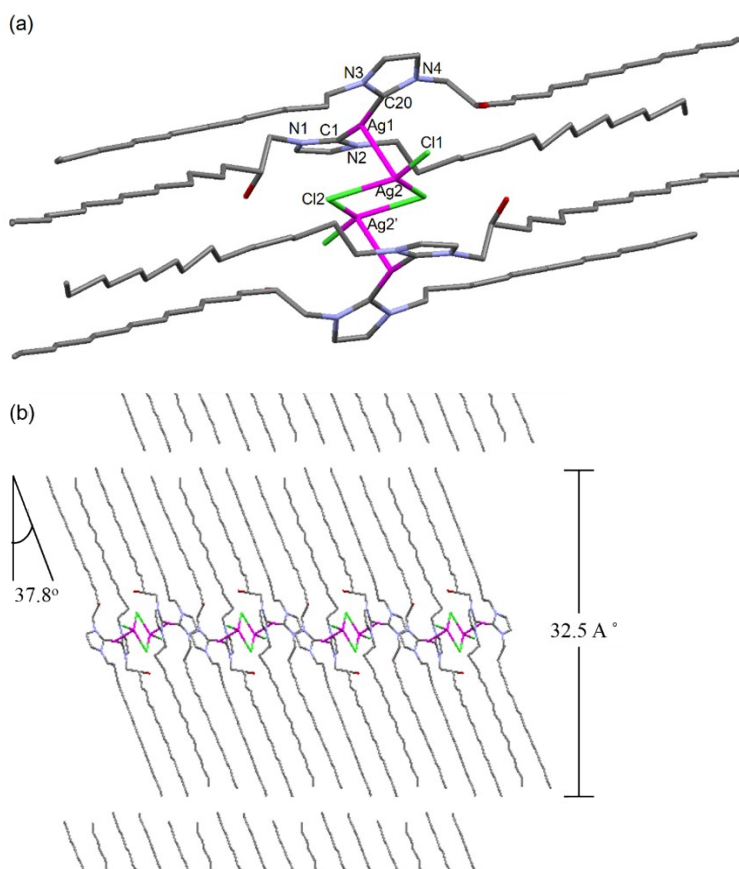

**Figure S1.** (a) Crystal structure of **1**. Selected bond distances [ $\text{\AA}$ ] and angles [ $^\circ$ ]: Ag(1)–Ag(2) 3.314(3); Ag(1)–Ag(2') 3.227(2); Ag(2)–Ag(2') 3.311(3); Ag(1)–C(1) 2.065(13); Ag(1)–C(20) 2.080(15); N(1)–C(1)–N(2) 103.9(13); N(4)–C(20)–N(3) 103.5(14); C(1)–Ag(1)–C(20) 165.3(6); Ag(2)–Ag(1)–Ag(2') 60.81(6); Ag(2)–Cl(2)–Ag(2') 80.65(16). (b) Crystal packing of **1**.

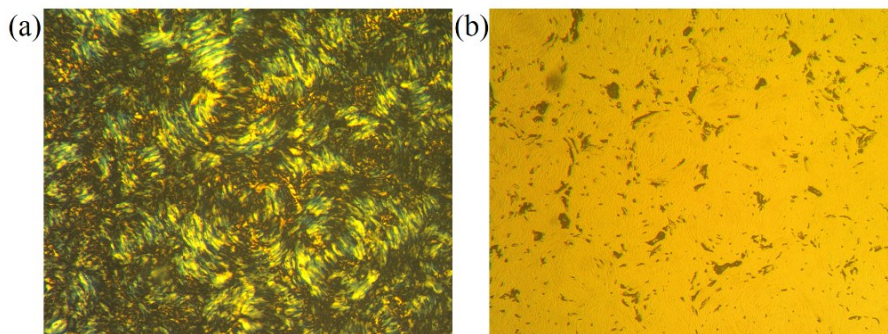

**Figure S2.** POM image of **2** recorded at room temperature upon cooling from isotropic liquid (a) with and (b) without cross-polarizer. (at the rate of 10 °C/min).

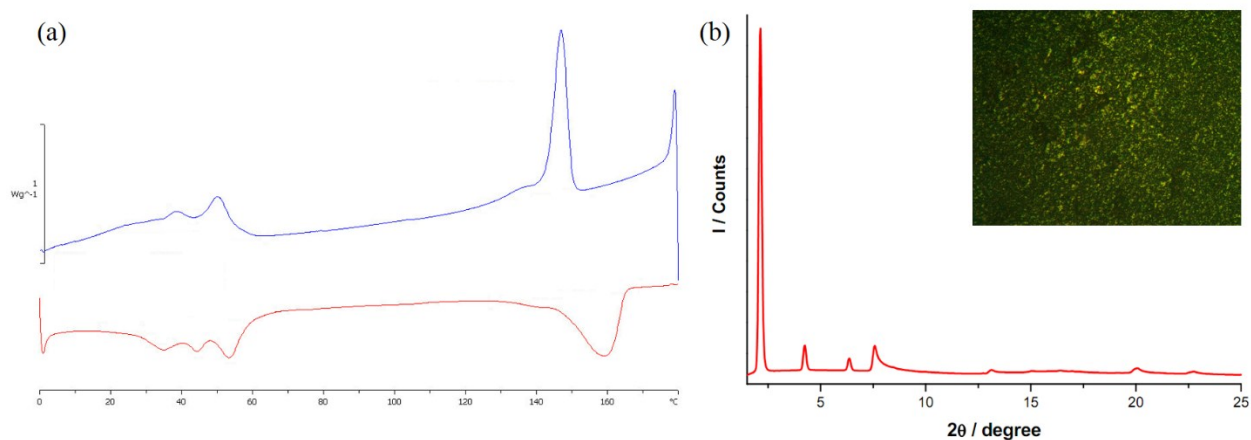

**Figure S3.** (a) DSC thermograms of **3**. (b) PXRD patterns and POM image of **3** at 120 °C under cooling process (at the rate of 10 °C/min).

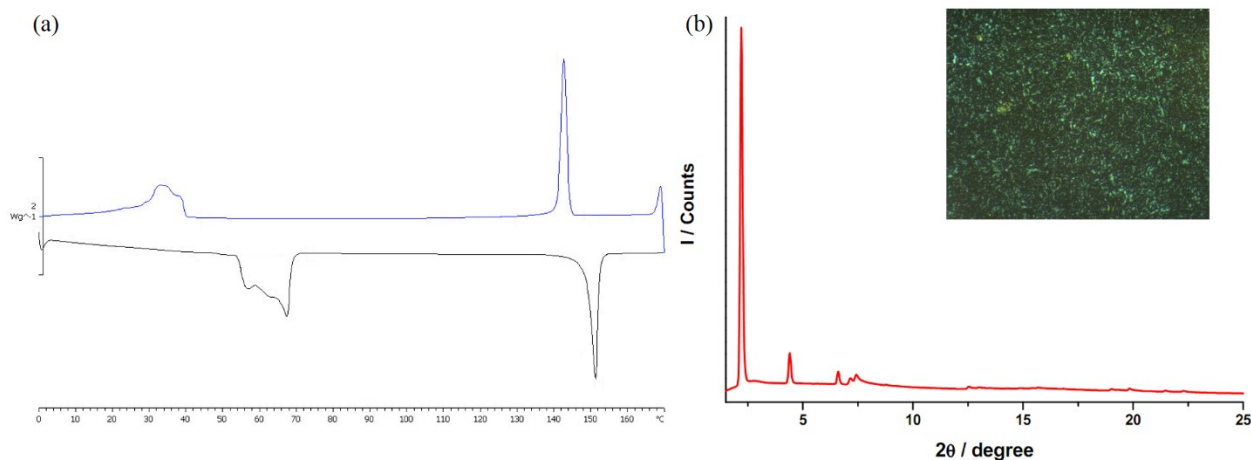

**Figure S4.** (a) DSC thermograms of **4**. (b) PXRD patterns and POM image of **4** at 120 °C under cooling process (at the rate of 10 °C/min).

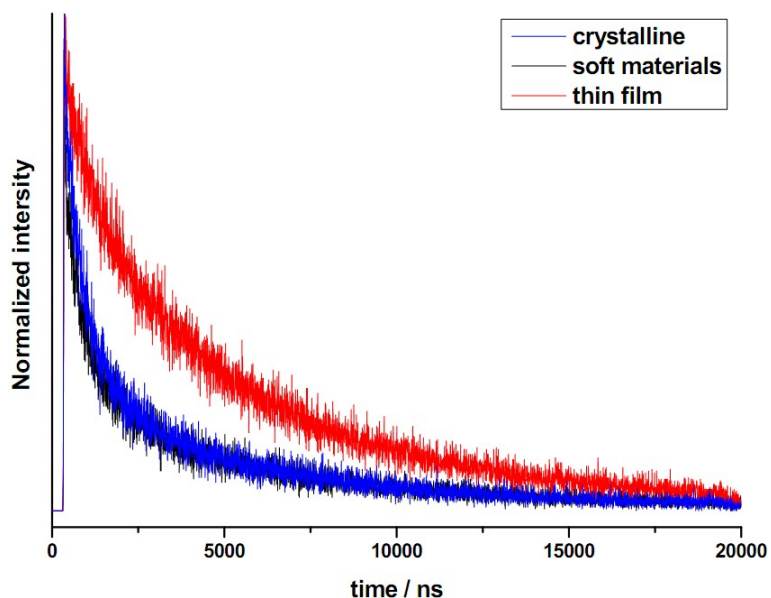

**Figure S5.** Emission decay profiles of **2** as crystalline at 610 nm (blue line), soft materials at 620 nm (black line) and thin film at 650 nm (red line) under excitation at 306 nm.

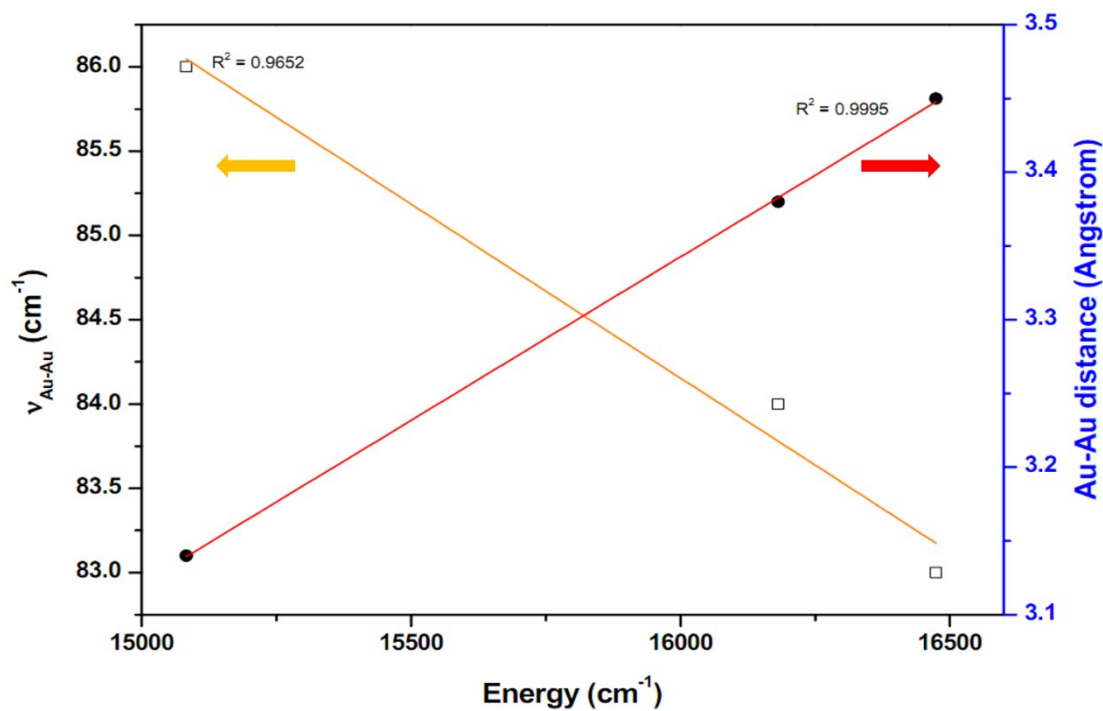

**Figure S6.** Plot of  $\nu_{\text{Au-Au}}$  (cm<sup>-1</sup>) (left) and Au-Au distance (Å) (right) versus the emission energy (cm<sup>-1</sup>).

**Table S1.** Crystal data and structure refinement for **1**.

|                                   |                                                                                                                        |
|-----------------------------------|------------------------------------------------------------------------------------------------------------------------|
| Identification code               | 1                                                                                                                      |
| Empirical formula                 | C <sub>70</sub> H <sub>136</sub> Ag <sub>2</sub> Cl <sub>2</sub> N <sub>4</sub> O <sub>2</sub>                         |
| Formula weight                    | 1352.46                                                                                                                |
| Temperature                       | 296(2) K                                                                                                               |
| Wavelength                        | 0.71073 Å                                                                                                              |
| Crystal system                    | Triclinic                                                                                                              |
| Space group                       | P(-)1                                                                                                                  |
| Unit cell dimensions              | a = 10.710(6) Å    α = 90.210(11) °.<br>b = 12.206(7) Å    β = 92.509(12) °.<br>c = 32.320(19) Å    γ = 113.758(10) °. |
| Volume                            | 3862(4) Å <sup>3</sup>                                                                                                 |
| Z                                 | 2                                                                                                                      |
| Density (calculated)              | 1.163 Mg/m <sup>3</sup>                                                                                                |
| Absorption coefficient            | 0.617 mm <sup>-1</sup>                                                                                                 |
| F(000)                            | 1456                                                                                                                   |
| Crystal size                      | 0.210 x 0.110 x 0.070 mm <sup>3</sup>                                                                                  |
| Theta range for data collection   | 1.823 to 25.000°.                                                                                                      |
| Index ranges                      | -12<=h<=12, -14<=k<=14, -38<=l<=38                                                                                     |
| Reflections collected             | 44934                                                                                                                  |
| Independent reflections           | 13579 [R(int) = 0.3862]                                                                                                |
| Completeness to theta = 25.000°   | 99.9 %                                                                                                                 |
| Max. and min. transmission        | 0.7454 and 0.4403                                                                                                      |
| Refinement method                 | Full-matrix least-squares on F <sup>2</sup>                                                                            |
| Data / restraints / parameters    | 13579 / 528 / 722                                                                                                      |
| Goodness-of-fit on F <sup>2</sup> | 0.918                                                                                                                  |
| Final R indices [I>2sigma(I)]     | R1 = 0.0894, wR2 = 0.2044                                                                                              |
| R indices (all data)              | R1 = 0.3441, wR2 = 0.3622                                                                                              |
| Largest diff. peak and hole       | 0.573 and -0.487 e.Å <sup>-3</sup>                                                                                     |

---

<sup>a</sup>  $R_1 = \frac{\sum ||F_o| - |F_c||}{\sum |F_o|}$ .

<sup>b</sup>  $wR_2 = \{\sum w(F_o^2 - F_c^2)^2 / \sum w(F_o^2)^2\}^{1/2}$ .

**Table S2.** Atomic coordinates ( $\times 10^4$ ) and equivalent isotropic displacement parameters ( $\text{\AA}^2 \times 10^3$ ) for **1**.

| Atom  | x         | y        | z         | U(eq) <sup>a</sup> |
|-------|-----------|----------|-----------|--------------------|
| Ag(1) | 7559(14)  | 5019(10) | 258(5)    | 108(8)             |
| Ag(2) | 4230(15)  | 3537(11) | 63(5)     | 123(8)             |
| Cl(2) | 4638(5)   | 5303(4)  | 566(16)   | 108(17)            |
| Cl(1) | 3188(4)   | 1413(3)  | 191(18)   | 128(2)             |
| O(1)  | 8914(19)  | 8403(15) | -814(6)   | 214(7)             |
| O(2)  | 4380(3)   | 1920(2)  | 1187(7)   | 271(10)            |
| N(2)  | 6899(12)  | 2347(10) | 39(5)     | 93(4)              |
| N(1)  | 6644(15)  | 2587(13) | 688(6)    | 121(5)             |
| N(4)  | 9506(13)  | 7447(11) | -81(6)    | 100(4)             |
| N(3)  | 8998(13)  | 7717(11) | 540(5)    | 105(4)             |
| C(1)  | 6937(15)  | 3200(11) | 336(6)    | 96(4)              |
| C(20) | 8673(16)  | 6856(13) | 221(6)    | 98(4)              |
| C(4)  | 6630(3)   | 3130(2)  | 1103(7)   | 171(7)             |
| C(58) | 7280(2)   | 2643(17) | -383(7)   | 138(6)             |
| C(2)  | 6556(16)  | 1288(11) | 219(7)    | 105(5)             |
| C(21) | 10299(16) | 8636(14) | 37(7)     | 106(5)             |
| C(42) | 9602(19)  | 6991(15) | -475(7)   | 120(5)             |
| C(43) | 8900(3)   | 7230(2)  | -812(9)   | 155(7)             |
| C(22) | 9953(18)  | 8755(15) | 416(7)    | 118(6)             |
| C(3)  | 6399(18)  | 1362(15) | 619(7)    | 116(6)             |
| C(48) | 9460(3)   | 5390(2)  | 2264(8)   | 174(9)             |
| C(9)  | 4320(3)   | 5670(3)  | 2169(8)   | 197(11)            |
| C(47) | 9860(3)   | 5160(2)  | 1868(8)   | 210(12)            |
| C(49) | 9180(3)   | 6430(2)  | 2380(8)   | 206(12)            |
| C(45) | 10530(3)  | 4010(2)  | 1347(8)   | 205(12)            |
| C(10) | 3990(3)   | 5940(3)  | 2580(8)   | 198(11)            |
| C(52) | 8090(3)   | 7800(3)  | 3289(9)   | 226(13)            |
| C(46) | 10180(3)  | 4190(2)  | 1763(8)   | 190(10)            |
| C(11) | 3750(3)   | 6960(3)  | 2675(9)   | 205(12)            |
| C(26) | 7390(3)   | 9580(3)  | 1612(9)   | 208(12)            |
| C(23) | 8330(2)   | 7506(17) | 916(7)    | 140(6)             |
| C(25) | 7490(3)   | 8450(2)  | 1463(8)   | 182(9)             |
| C(27) | 6880(3)   | 9610(3)  | 2009(9)   | 195(10)            |
| C(28) | 6730(3)   | 10700(3) | 2141(9)   | 204(11)            |
| C(29) | 6270(3)   | 10870(3) | 2546(9)   | 205(11)            |
| C(63) | 7770(4)   | 60(3)    | -1795(11) | 309(18)            |
| C(30) | 6210(4)   | 11990(3) | 2655(10)  | 233(14)            |
| C(68) | 9730(4)   | -2580(3) | -3218(13) | 310(2)             |
| C(65) | 8120(4)   | -1310(2) | -2391(12) | 294(17)            |
| C(72) | 10900(5)  | -4910(3) | -4285(15) | 380(3)             |



|       |          |          |           |         |
|-------|----------|----------|-----------|---------|
| C(62) | 7730(3)  | 1250(2)  | -1679(9)  | 236(11) |
| C(64) | 8460(3)  | -100(2)  | -2179(9)  | 235(11) |
| C(59) | 6320(3)  | 1880(2)  | -732(7)   | 255(12) |
| C(34) | 5010(4)  | 14490(3) | 3710(11)  | 248(14) |
| C(33) | 5180(4)  | 13390(3) | 3588(11)  | 254(15) |
| C(38) | 3920(5)  | 16920(3) | 4725(11)  | 360(3)  |
| C(36) | 4480(5)  | 15770(4) | 4219(11)  | 310(2)  |
| C(37) | 3870(4)  | 15670(3) | 4644(11)  | 320(2)  |
| C(61) | 7130(4)  | 1280(3)  | -1266(10) | 285(17) |
| C(66) | 9150(3)  | -1330(3) | -2698(12) | 291(17) |
| C(73) | 10530(4) | -6200(3) | -4443(12) | 340(2)  |
| C(69) | 9490(4)  | -3690(3) | -3389(12) | 277(16) |
| C(71) | 10030(4) | -4940(3) | -3917(12) | 290(16) |
| C(16) | 2080(4)  | 9590(3)  | 4132(10)  | 266(17) |
| C(53) | 7850(3)  | 8820(2)  | 3434(9)   | 210(12) |
| C(51) | 8530(3)  | 7590(2)  | 2902(9)   | 213(13) |
| C(31) | 5730(4)  | 12080(3) | 3062(10)  | 242(14) |
| C(50) | 8760(3)  | 6620(2)  | 2778(8)   | 196(11) |
| C(35) | 4560(4)  | 14730(3) | 4110(12)  | 300(2)  |
| C(32) | 5590(3)  | 13200(3) | 3185(10)  | 231(13) |
| C(5)  | 5310(4)  | 3050(3)  | 1153(8)   | 227(10) |
| C(44) | 9250(3)  | 7040(2)  | -1243(8)  | 177(9)  |
| C(54) | 7460(4)  | 9050(3)  | 3822(10)  | 244(15) |
| C(13) | 3130(3)  | 8220(3)  | 3189(8)   | 211(12) |
| C(14) | 2770(3)  | 8450(3)  | 3621(8)   | 218(13) |
| C(8)  | 4730(4)  | 4720(3)  | 2117(8)   | 231(15) |
| C(7)  | 4820(3)  | 4350(2)  | 1701(7)   | 192(11) |
| C(56) | 6900(4)  | 10260(3) | 4324(11)  | 272(16) |
| C(55) | 7250(4)  | 10030(3) | 3936(10)  | 252(15) |
| C(6)  | 5270(4)  | 3340(3)  | 1613(8)   | 259(12) |
| C(12) | 3380(3)  | 7180(2)  | 3085(8)   | 193(11) |
| C(57) | 6690(4)  | 11250(3) | 4483(11)  | 350(2)  |
| C(17) | 1900(4)  | 10730(3) | 4201(10)  | 246(14) |
| C(15) | 2490(4)  | 9480(3)  | 3708(10)  | 236(14) |
| C(18) | 1600(5)  | 10950(3) | 4642(10)  | 310(2)  |
| C(19) | 1480(4)  | 12010(3) | 4738(11)  | 320(2)  |
| C(60) | 7100(4)  | 2470(2)  | -1121(9)  | 279(14) |
| C(70) | 10250(5) | -3820(4) | -3748(15) | 340(2)  |
| C(67) | 8870(4)  | -2410(3) | -2876(12) | 287(17) |
| C(24) | 7870(3)  | 8530(2)  | 999(8)    | 179(9)  |

---

<sup>a</sup>  $U(\text{eq})$  is defined as one third of the trace of the orthogonalized  $U_{ij}$  tensor.

**Table S3.** Anisotropic displacement parameters ( $\text{\AA}^2 \times 10^3$ ) for **1**.

| Atom  | U <sub>11</sub> | U <sub>22</sub> | U <sub>33</sub> | U <sub>12</sub> | U <sub>13</sub> | U <sub>23</sub> |
|-------|-----------------|-----------------|-----------------|-----------------|-----------------|-----------------|
| Ag(1) | 85(11)          | 50(8)           | 19(18)          | 26(7)           | 2(10)           | 3(8)            |
| Ag(2) | 108(13)         | 62(9)           | 19(2)           | 28(9)           | 8(12)           | -2(10)          |
| Cl(2) | 106(3)          | 70(3)           | 15(5)           | 38(3)           | 6(3)            | -6(3)           |
| Cl(1) | 72(3)           | 58(2)           | 25(7)           | 27(2)           | 0(3)            | -14(3)          |
| O(1)  | 250(19)         | 148(11)         | 28(16)          | 118(13)         | 5(14)           | 15(11)          |
| O(2)  | 300(2)          | 300(2)          | 24(19)          | 141(17)         | 78(14)          | 16(15)          |
| N(2)  | 64(8)           | 55(6)           | 18(9)           | 36(6)           | 15(7)           | 17(6)           |
| N(1)  | 119(11)         | 68(7)           | 18(9)           | 38(7)           | 17(8)           | 16(6)           |
| N(4)  | 55(7)           | 58(6)           | 19(10)          | 28(5)           | -1(6)           | 6(6)            |
| N(3)  | 76(8)           | 55(6)           | 18(10)          | 23(6)           | 1(7)            | 1(6)            |
| C(1)  | 61(9)           | 58(6)           | 17(10)          | 27(6)           | 12(7)           | 9(5)            |
| C(20) | 61(8)           | 49(6)           | 19(10)          | 24(5)           | 3(7)            | 1(5)            |
| C(4)  | 260(2)          | 111(12)         | 17(11)          | 108(14)         | 26(10)          | 21(8)           |
| C(58) | 162(17)         | 106(12)         | 19(10)          | 97(12)          | 43(9)           | 39(8)           |
| C(2)  | 82(12)          | 64(7)           | 18(11)          | 37(7)           | 7(10)           | 14(7)           |
| C(21) | 52(9)           | 62(7)           | 20(12)          | 15(6)           | 2(8)            | 7(7)            |
| C(42) | 101(12)         | 74(10)          | 19(11)          | 45(9)           | 9(8)            | 9(7)            |
| C(43) | 157(17)         | 117(12)         | 21(12)          | 76(13)          | -23(11)         | -1(10)          |
| C(22) | 85(11)          | 61(7)           | 20(12)          | 22(7)           | 7(9)            | 0(7)            |
| C(3)  | 98(13)          | 72(7)           | 18(11)          | 36(8)           | 14(10)          | 18(7)           |
| C(48) | 210(2)          | 152(17)         | 16(16)          | 76(17)          | -28(15)         | -41(14)         |
| C(9)  | 250(3)          | 210(2)          | 15(16)          | 120(2)          | 10(16)          | 17(15)          |
| C(47) | 340(3)          | 170(2)          | 16(17)          | 140(2)          | 2(18)           | -26(15)         |
| C(49) | 320(3)          | 158(18)         | 16(17)          | 120(2)          | 23(19)          | -16(15)         |
| C(45) | 290(3)          | 140(2)          | 19(2)           | 100(2)          | 0(2)            | -50(16)         |
| C(10) | 270(3)          | 200(2)          | 15(16)          | 120(2)          | 21(17)          | 32(15)          |
| C(52) | 320(4)          | 210(2)          | 17(19)          | 120(2)          | 30(2)           | -32(17)         |
| C(46) | 250(3)          | 158(18)         | 18(19)          | 104(19)         | -19(18)         | -43(15)         |
| C(11) | 280(3)          | 210(2)          | 16(16)          | 130(2)          | 14(17)          | 27(15)          |
| C(26) | 260(3)          | 207(19)         | 20(17)          | 140(2)          | 14(17)          | -11(15)         |
| C(23) | 108(14)         | 93(11)          | 20(12)          | 18(10)          | 21(10)          | -8(9)           |
| C(25) | 190(2)          | 179(17)         | 20(16)          | 99(17)          | 17(14)          | -5(13)          |
| C(27) | 220(3)          | 207(19)         | 19(17)          | 120(19)         | -6(16)          | -15(15)         |
| C(28) | 240(3)          | 205(19)         | 20(18)          | 120(2)          | 12(18)          | -7(16)          |
| C(29) | 230(3)          | 220(2)          | 19(18)          | 120(2)          | -1(17)          | -8(16)          |
| C(63) | 340(4)          | 185(19)         | 31(3)           | 0(2)            | 100(3)          | 102(17)         |
| C(30) | 310(4)          | 240(2)          | 20(19)          | 160(2)          | 10(2)           | -2(18)          |
| C(68) | 260(4)          | 200(2)          | 35(3)           | -40(2)          | 90(3)           | 70(2)           |
| C(65) | 240(3)          | 210(2)          | 32(3)           | -30(2)          | 50(2)           | 60(19)          |
| C(72) | 410(5)          | 290(3)          | 35(4)           | 30(3)           | 100(4)          | 60(3)           |
| C(62) | 190(2)          | 178(17)         | 24(2)           | -29(17)         | 12(18)          | 74(15)          |

|       |        |         |        |         |         |         |
|-------|--------|---------|--------|---------|---------|---------|
| C(64) | 160(2) | 204(19) | 25(2)  | -19(17) | -12(18) | 79(16)  |
| C(59) | 320(2) | 174(19) | 21(13) | 37(18)  | -9(12)  | 30(11)  |
| C(34) | 260(3) | 250(2)  | 24(2)  | 110(2)  | 10(2)   | -20(2)  |
| C(33) | 310(4) | 260(3)  | 22(2)  | 140(3)  | 10(2)   | -10(2)  |
| C(38) | 540(7) | 320(3)  | 29(3)  | 240(4)  | 70(4)   | 10(3)   |
| C(36) | 430(6) | 270(3)  | 27(3)  | 180(3)  | 60(3)   | 10(2)   |
| C(37) | 440(5) | 300(3)  | 27(3)  | 200(4)  | 60(3)   | 10(2)   |
| C(61) | 320(4) | 180(2)  | 27(2)  | 10(2)   | 70(2)   | 74(16)  |
| C(66) | 220(3) | 220(2)  | 32(3)  | -30(2)  | 40(2)   | 60(2)   |
| C(73) | 350(5) | 290(3)  | 31(3)  | 50(3)   | 20(3)   | 40(3)   |
| C(69) | 260(3) | 200(2)  | 26(3)  | -10(2)  | 20(3)   | 90(2)   |
| C(71) | 280(4) | 230(3)  | 26(3)  | 10(2)   | 10(3)   | 70(2)   |
| C(16) | 360(5) | 250(2)  | 22(2)  | 150(3)  | 30(2)   | 10(2)   |
| C(53) | 280(3) | 200(2)  | 17(19) | 100(2)  | 9(19)   | -39(16) |
| C(51) | 310(3) | 190(2)  | 17(18) | 120(2)  | 20(19)  | -24(16) |
| C(31) | 320(4) | 250(2)  | 20(2)  | 160(3)  | 10(2)   | -1(18)  |
| C(50) | 270(3) | 179(19) | 15(17) | 100(2)  | -1(17)  | -30(15) |
| C(35) | 400(5) | 270(3)  | 26(2)  | 180(3)  | 60(3)   | 10(2)   |
| C(32) | 290(4) | 230(2)  | 21(2)  | 140(2)  | 10(2)   | 3(19)   |
| C(5)  | 280(2) | 270(2)  | 18(15) | 165(16) | 35(13)  | 16(14)  |
| C(44) | 210(2) | 143(17) | 21(13) | 103(18) | -9(12)  | 14(11)  |
| C(54) | 330(4) | 240(3)  | 18(2)  | 130(3)  | 20(2)   | -50(18) |
| C(13) | 280(3) | 220(2)  | 16(17) | 140(2)  | -1(18)  | 28(16)  |
| C(14) | 290(3) | 210(2)  | 18(17) | 120(2)  | 23(19)  | 27(17)  |
| C(8)  | 370(4) | 270(3)  | 12(15) | 210(3)  | 15(17)  | 26(15)  |
| C(7)  | 270(3) | 230(2)  | 12(14) | 150(2)  | 3(16)   | 24(14)  |
| C(56) | 330(4) | 310(3)  | 20(2)  | 160(3)  | 0(2)    | -90(2)  |
| C(55) | 340(4) | 250(3)  | 19(2)  | 150(3)  | 10(2)   | -68(19) |
| C(6)  | 390(3) | 290(2)  | 19(15) | 230(2)  | 33(15)  | 26(14)  |
| C(12) | 250(3) | 210(2)  | 15(16) | 120(2)  | 7(16)   | 34(15)  |
| C(57) | 480(7) | 350(4)  | 27(3)  | 230(4)  | 30(4)   | -110(3) |
| C(17) | 290(4) | 220(2)  | 24(2)  | 110(3)  | 20(2)   | 10(2)   |
| C(15) | 300(4) | 230(2)  | 20(2)  | 140(3)  | 0(2)    | 8(18)   |
| C(18) | 480(7) | 260(3)  | 25(2)  | 200(4)  | 70(3)   | 30(2)   |
| C(19) | 470(7) | 250(3)  | 28(3)  | 190(4)  | 70(3)   | 20(2)   |
| C(60) | 350(3) | 200(2)  | 24(15) | 50(2)   | 22(15)  | 58(13)  |
| C(70) | 350(5) | 230(3)  | 33(4)  | -10(3)  | 90(4)   | 70(2)   |
| C(67) | 220(3) | 210(2)  | 30(3)  | -50(2)  | 50(3)   | 70(2)   |
| C(24) | 190(2) | 143(15) | 22(16) | 76(16)  | 40(15)  | -22(13) |

---

**Table S4.** Hydrogen coordinates ( $\times 10^4$ ) and isotropic displacement parameters ( $\text{\AA}^2 \times 10^3$ ) for **1**.

| Atom   | x    | y    | z   | U(eq) |
|--------|------|------|-----|-------|
| H(1A)  | 885  | 861  | -58 | 32    |
| H(2A)  | 429  | 155  | 97  | 41    |
| H(4A)  | 689  | 270  | 132 | 21    |
| H(4B)  | 728  | 396  | 112 | 21    |
| H(58A) | 816  | 262  | -41 | 17    |
| H(58B) | 739  | 347  | -42 | 17    |
| H(2B)  | 644  | 58   | 8   | 13    |
| H(8)   | 1094 | 922  | -12 | 13    |
| H(7)   | 1056 | 730  | -54 | 14    |
| H(21B) | 928  | 613  | -46 | 14    |
| H(43A) | 794  | 669  | -79 | 19    |
| H(22A) | 1032 | 946  | 58  | 14    |
| H(3A)  | 618  | 76   | 81  | 14    |
| H(48A) | 1016 | 538  | 246 | 21    |
| H(48B) | 863  | 470  | 232 | 21    |
| H(9A)  | 353  | 551  | 199 | 24    |
| H(9B)  | 504  | 639  | 207 | 24    |
| H(47A) | 914  | 513  | 167 | 25    |
| H(47B) | 1066 | 588  | 181 | 25    |
| H(49A) | 1001 | 713  | 233 | 25    |
| H(49B) | 849  | 646  | 218 | 25    |
| H(45A) | 980  | 402  | 116 | 25    |
| H(45B) | 1134 | 470  | 129 | 25    |
| H(10A) | 318  | 526  | 265 | 24    |
| H(10B) | 473  | 596  | 277 | 24    |
| H(52A) | 874  | 772  | 349 | 27    |
| H(52B) | 724  | 711  | 333 | 27    |
| H(46A) | 941  | 347  | 183 | 23    |
| H(46B) | 1095 | 424  | 195 | 23    |
| H(11A) | 304  | 696  | 248 | 25    |
| H(11B) | 457  | 765  | 261 | 25    |
| H(26A) | 830  | 1022 | 161 | 25    |
| H(26B) | 682  | 977  | 141 | 25    |
| H(23A) | 894  | 747  | 114 | 17    |
| H(23B) | 754  | 675  | 90  | 17    |
| H(25A) | 663  | 777  | 149 | 22    |
| H(25B) | 818  | 831  | 163 | 22    |
| H(27A) | 749  | 946  | 221 | 23    |
| H(27B) | 600  | 895  | 202 | 23    |
| H(28A) | 762  | 1136 | 212 | 25    |
| H(28B) | 612  | 1083 | 194 | 25    |

|        |      |      |      |    |
|--------|------|------|------|----|
| H(29A) | 536  | 1025 | 257  | 25 |
| H(29B) | 685  | 1072 | 276  | 25 |
| H(63A) | 684  | -52  | -182 | 37 |
| H(63B) | 821  | -16  | -156 | 37 |
| H(30A) | 562  | 1215 | 245  | 28 |
| H(30B) | 712  | 1262 | 264  | 28 |
| H(68A) | 966  | -209 | -345 | 37 |
| H(68B) | 1067 | -224 | -311 | 37 |
| H(65A) | 723  | -156 | -254 | 35 |
| H(65B) | 804  | -189 | -218 | 35 |
| H(72A) | 1074 | -444 | -450 | 46 |
| H(72B) | 1187 | -455 | -420 | 46 |
| H(62A) | 865  | 187  | -167 | 28 |
| H(62B) | 720  | 145  | -189 | 28 |
| H(64A) | 832  | 41   | -239 | 28 |
| H(64B) | 944  | 23   | -211 | 28 |
| H(59A) | 544  | 192  | -73  | 31 |
| H(59B) | 620  | 105  | -71  | 31 |
| H(34A) | 589  | 1514 | 367  | 30 |
| H(34B) | 438  | 1458 | 350  | 30 |
| H(33A) | 583  | 1331 | 379  | 31 |
| H(33B) | 431  | 1273 | 363  | 31 |
| H(38A) | 355  | 1695 | 499  | 53 |
| H(38B) | 484  | 1750 | 473  | 53 |
| H(38C) | 338  | 1710 | 451  | 53 |
| H(6)   | 391  | 1596 | 401  | 37 |
| H(4)   | 538  | 1642 | 423  | 37 |
| H(5)   | 294  | 1507 | 464  | 38 |
| H(3)   | 441  | 1547 | 485  | 38 |
| H(61A) | 763  | 104  | -106 | 34 |
| H(61B) | 619  | 68   | -128 | 34 |
| H(66A) | 920  | -77  | -292 | 35 |
| H(66B) | 1005 | -105 | -256 | 35 |
| H(73A) | 1107 | -619 | -467 | 51 |
| H(73B) | 1070 | -666 | -423 | 51 |
| H(73C) | 958  | -655 | -453 | 51 |
| H(69A) | 853  | -408 | -347 | 33 |
| H(69B) | 966  | -416 | -317 | 33 |
| H(71A) | 908  | -535 | -401 | 35 |
| H(71B) | 1022 | -541 | -370 | 35 |
| H(16A) | 277  | 956  | 433  | 32 |
| H(16B) | 123  | 892  | 418  | 32 |
| H(53A) | 869  | 951  | 339  | 25 |
| H(53B) | 717  | 888  | 324  | 25 |
| H(51A) | 787  | 765  | 270  | 26 |
| H(51B) | 937  | 828  | 286  | 26 |

|        |      |      |      |    |
|--------|------|------|------|----|
| H(31A) | 635  | 1196 | 327  | 29 |
| H(31B) | 485  | 1142 | 308  | 29 |
| H(50A) | 792  | 593  | 282  | 24 |
| H(50B) | 944  | 657  | 298  | 24 |
| H(35A) | 366  | 1410 | 414  | 36 |
| H(35B) | 516  | 1460 | 432  | 36 |
| H(32A) | 646  | 1385 | 315  | 28 |
| H(32B) | 494  | 1330 | 299  | 28 |
| H(5A)  | 502  | 354  | 96   | 27 |
| H(44A) | 852  | 704  | -143 | 21 |
| H(44B) | 1006 | 773  | -131 | 21 |
| H(54A) | 662  | 837  | 387  | 29 |
| H(54B) | 815  | 901  | 402  | 29 |
| H(13A) | 240  | 821  | 300  | 25 |
| H(13B) | 394  | 891  | 312  | 25 |
| H(14A) | 197  | 775  | 369  | 26 |
| H(14B) | 351  | 848  | 381  | 26 |
| H(8A)  | 409  | 403  | 226  | 28 |
| H(8B)  | 562  | 495  | 226  | 28 |
| H(7A)  | 544  | 505  | 156  | 23 |
| H(7B)  | 393  | 414  | 156  | 23 |
| H(56A) | 758  | 1018 | 451  | 33 |
| H(56B) | 605  | 958  | 437  | 33 |
| H(55A) | 655  | 1006 | 374  | 30 |
| H(55B) | 808  | 1071 | 388  | 30 |
| H(2)   | 465  | 262  | 174  | 31 |
| H(1)   | 617  | 355  | 174  | 31 |
| H(12A) | 256  | 649  | 315  | 23 |
| H(12B) | 410  | 717  | 328  | 23 |
| H(57A) | 645  | 1112 | 477  | 52 |
| H(57B) | 752  | 1196 | 447  | 52 |
| H(57C) | 597  | 1135 | 432  | 52 |
| H(17A) | 116  | 1073 | 402  | 30 |
| H(17B) | 273  | 1140 | 413  | 30 |
| H(15A) | 177  | 947  | 351  | 28 |
| H(15B) | 331  | 1019 | 366  | 28 |
| H(18A) | 76   | 1029 | 471  | 37 |
| H(18B) | 233  | 1090 | 482  | 37 |
| H(19A) | 130  | 1203 | 503  | 48 |
| H(19B) | 232  | 1268 | 469  | 48 |
| H(19C) | 75   | 1207 | 457  | 48 |
| H(60A) | 659  | 276  | -131 | 34 |
| H(60B) | 801  | 309  | -106 | 34 |
| H(70A) | 1007 | -336 | -397 | 41 |
| H(70B) | 1122 | -342 | -367 | 41 |
| H(67A) | 794  | -272 | -299 | 34 |

|        |     |      |      |    |
|--------|-----|------|------|----|
| H(67B) | 890 | -294 | -266 | 34 |
| H(24A) | 709 | 844  | 82   | 21 |
| H(24B) | 860 | 930  | 95   | 21 |

---

**Table S5.** Bond lengths [Å] and angles [°] for **1**.

| Bond lengths             |           |                           |           |
|--------------------------|-----------|---------------------------|-----------|
| Ag(1)-C(1)               | 2.065(13) | C(36)-C(37)               | 1.531(10) |
| C(23)-C(24)              | 1.54(3)   | N(3)-C(20)                | 1.40(2)   |
| Ag(1)-C(20)              | 2.080(15) | C(61)-C(60)               | 1.530(10) |
| C(25)-C(24)              | 1.56(3)   | N(3)-C(23)                | 1.41(2)   |
| Ag(1)-Ag(2) <sup>i</sup> | 3.227(2)  | C(66)-C(67)               | 1.36(4)   |
| C(27)-C(28)              | 1.47(3)   | C(4)-C(5)                 | 1.40(4)   |
| Ag(1)-Ag(2)              | 3.314(3)  | C(69)-C(70)               | 1.48(5)   |
| C(28)-C(29)              | 1.47(3)   | C(58)-C(59)               | 1.519(10) |
| Ag(2)-Cl(1)              | 2.420(5)  | C(71)-C(70)               | 1.40(5)   |
| C(29)-C(30)              | 1.44(3)   | C(2)-C(3)                 | 1.32(2)   |
| Ag(2)-Cl(2) <sup>i</sup> | 2.540(5)  | C(16)-C(15)               | 1.48(3)   |
| C(63)-C(62)              | 1.522(10) | C(21)-C(22)               | 1.32(2)   |
| Ag(2)-Cl(2)              | 2.577(5)  | C(16)-C(17)               | 1.49(4)   |
| C(63)-C(64)              | 1.526(10) | C(42)-C(43)               | 1.40(3)   |
| Ag(2)-Ag(1) <sup>i</sup> | 3.227(2)  | C(53)-C(54)               | 1.40(3)   |
| C(30)-C(31)              | 1.45(3)   | C(43)-C(44)               | 1.50(3)   |
| Ag(2)-Ag(2) <sup>i</sup> | 3.311(3)  | C(51)-C(50)               | 1.37(3)   |
| C(68)-C(69)              | 1.38(4)   | C(48)-C(47)               | 1.43(3)   |
| Cl(2)-Ag(2) <sup>i</sup> | 2.540(5)  | C(31)-C(32)               | 1.48(3)   |
| C(68)-C(67)              | 1.529(10) | C(48)-C(49)               | 1.47(3)   |
| O(1)-C(43)               | 1.42(2)   | C(5)-C(6)                 | 1.535(10) |
| C(65)-C(64)              | 1.518(10) | C(9)-C(8)                 | 1.40(3)   |
| O(2)-C(5)                | 1.35(4)   | C(44)-C(45) <sup>ii</sup> | 1.43(3)   |
| C(65)-C(66)              | 1.525(10) | C(9)-C(10)                | 1.46(3)   |
| N(2)-C(2)                | 1.336(17) | C(54)-C(55)               | 1.35(3)   |
| C(72)-C(73)              | 1.533(10) | C(47)-C(46)               | 1.41(3)   |
| N(2)-C(1)                | 1.400(19) | C(13)-C(12)               | 1.44(3)   |
| C(72)-C(71)              | 1.534(10) | C(49)-C(50)               | 1.43(3)   |
| N(2)-C(58)               | 1.45(2)   | C(13)-C(14)               | 1.519(10) |
| C(62)-C(61)              | 1.514(10) | C(45)-C(44) <sup>ii</sup> | 1.43(3)   |
| N(1)-C(1)                | 1.34(2)   | C(14)-C(15)               | 1.43(3)   |
| C(59)-C(60)              | 1.551(10) | C(45)-C(46)               | 1.45(3)   |
| N(1)-C(3)                | 1.43(2)   | C(8)-C(7)                 | 1.44(3)   |
| C(34)-C(35)              | 1.47(4)   | C(10)-C(11)               | 1.40(3)   |
| N(1)-C(4)                | 1.49(2)   | C(7)-C(6)                 | 1.523(10) |
| C(34)-C(33)              | 1.47(4)   | C(52)-C(51)               | 1.41(3)   |
| N(4)-C(20)               | 1.353(19) | C(56)-C(55)               | 1.39(3)   |
| C(33)-C(32)              | 1.44(3)   | C(52)-C(53)               | 1.45(3)   |
| N(4)-C(21)               | 1.396(18) | C(56)-C(57)               | 1.41(4)   |
| C(38)-C(37)              | 1.527(10) | C(11)-C(12)               | 1.45(3)   |
| N(4)-C(42)               | 1.41(2)   | C(17)-C(18)               | 1.520(10) |
| C(36)-C(35)              | 1.36(4)   | C(26)-C(27)               | 1.42(3)   |
| N(3)-C(22)               | 1.344(19) | C(18)-C(19)               | 1.39(4)   |



C(26)-C(25) 1.51(3)

Angles

|                                              |            |                                  |           |
|----------------------------------------------|------------|----------------------------------|-----------|
| C(1)-Ag(1)-C(20)                             | 165.3(6)   | C(2)-N(2)-C(1)                   | 109.1(15) |
| C(44) <sup>ii</sup> -C(45)-C(46)             | 120(3)     | C(38)-C(37)-C(36)                | 103(3)    |
| C(1)-Ag(1)-Ag(2) <sup>i</sup>                | 128.6(4)   | C(2)-N(2)-C(58)                  | 127.8(16) |
| C(11)-C(10)-C(9)                             | 124(3)     | C(62)-C(61)-C(60)                | 118(2)    |
| C(20)-Ag(1)-Ag(2) <sup>i</sup>               | 66.0(4)    | C(1)-N(2)-C(58)                  | 123.0(14) |
| C(51)-C(52)-C(53)                            | 129(3)     | C(67)-C(66)-C(65)                | 115(3)    |
| C(1)-Ag(1)-Ag(2)                             | 67.9(4)    | C(1)-N(1)-C(3)                   | 111.2(18) |
| C(47)-C(46)-C(45)                            | 122(3)     | C(68)-C(69)-C(70)                | 121(4)    |
| C(20)-Ag(1)-Ag(2)                            | 126.8(4)   | C(1)-N(1)-C(4)                   | 124.4(16) |
| C(10)-C(11)-C(12)                            | 122(3)     | C(70)-C(71)-C(72)                | 115(4)    |
| Ag(2) <sup>i</sup> -Ag(1)-Ag(2)              | 60.81(6)   | C(3)-N(1)-C(4)                   | 124.3(18) |
| C(27)-C(26)-C(25)                            | 119(3)     | C(15)-C(16)-C(17)                | 113(3)    |
| Cl(1)-Ag(2)-Cl(2) <sup>i</sup>               | 131.94(18) | C(20)-N(4)-C(21)                 | 111.4(17) |
| N(3)-C(23)-C(24)                             | 108.6(18)  | C(54)-C(53)-C(52)                | 130(3)    |
| Cl(1)-Ag(2)-Cl(2)                            | 128.61(19) | C(20)-N(4)-C(42)                 | 127.3(15) |
| C(26)-C(25)-C(24)                            | 111(2)     | C(50)-C(51)-C(52)                | 128(3)    |
| Cl(2) <sup>i</sup> -Ag(2)-Cl(2)              | 99.35(16)  | C(21)-N(4)-C(42)                 | 121.3(17) |
| C(26)-C(27)-C(28)                            | 118(3)     | C(30)-C(31)-C(32)                | 119(3)    |
| Cl(1)-Ag(2)-Ag(1) <sup>i</sup>               | 121.66(12) | C(22)-N(3)-C(20)                 | 109.2(18) |
| C(29)-C(28)-C(27)                            | 124(3)     | C(51)-C(50)-C(49)                | 126(3)    |
| Cl(2) <sup>i</sup> -Ag(2)-Ag(1) <sup>i</sup> | 72.90(11)  | C(22)-N(3)-C(23)                 | 127.3(18) |
| C(30)-C(29)-C(28)                            | 120(3)     | C(36)-C(35)-C(34)                | 125(4)    |
| Cl(2)-Ag(2)-Ag(1) <sup>i</sup>               | 70.42(12)  | C(20)-N(3)-C(23)                 | 123.3(15) |
| C(62)-C(63)-C(64)                            | 122(3)     | C(33)-C(32)-C(31)                | 123(3)    |
| Cl(1)-Ag(2)-Ag(2) <sup>i</sup>               | 176.59(16) | N(1)-C(1)-N(2)                   | 103.9(13) |
| C(29)-C(30)-C(31)                            | 117(3)     | O(2)-C(5)-C(4)                   | 113(3)    |
| Cl(2) <sup>i</sup> -Ag(2)-Ag(2) <sup>i</sup> | 50.16(11)  | N(1)-C(1)-Ag(1)                  | 128.4(13) |
| C(69)-C(68)-C(67)                            | 123(3)     | O(2)-C(5)-C(6)                   | 93(2)     |
| Cl(2)-Ag(2)-Ag(2) <sup>i</sup>               | 49.19(12)  | N(2)-C(1)-Ag(1)                  | 127.2(14) |
| C(64)-C(65)-C(66)                            | 115(3)     | C(4)-C(5)-C(6)                   | 105(3)    |
| Ag(1) <sup>i</sup> -Ag(2)-Ag(2) <sup>i</sup> | 60.90(6)   | N(4)-C(20)-N(3)                  | 103.5(14) |
| C(73)-C(72)-C(71)                            | 109(4)     | C(45) <sup>ii</sup> -C(44)-C(43) | 121(2)    |
| Cl(1)-Ag(2)-Ag(1)                            | 119.09(12) | N(4)-C(20)-Ag(1)                 | 127.4(13) |
| C(61)-C(62)-C(63)                            | 115(2)     | C(55)-C(54)-C(53)                | 127(4)    |
| Cl(2) <sup>i</sup> -Ag(2)-Ag(1)              | 69.29(12)  | N(3)-C(20)-Ag(1)                 | 127.4(14) |
| C(65)-C(64)-C(63)                            | 123(3)     | C(12)-C(13)-C(14)                | 122(3)    |
| Cl(2)-Ag(2)-Ag(1)                            | 70.93(11)  | C(5)-C(4)-N(1)                   | 108(2)    |
| C(58)-C(59)-C(60)                            | 102(2)     | C(15)-C(14)-C(13)                | 120(3)    |
| Ag(1) <sup>i</sup> -Ag(2)-Ag(1)              | 119.19(6)  | N(2)-C(58)-C(59)                 | 118.4(19) |
| C(35)-C(34)-C(33)                            | 126(4)     | C(9)-C(8)-C(7)                   | 118(3)    |
| Ag(2) <sup>i</sup> -Ag(2)-Ag(1)              | 58.29(5)   | C(3)-C(2)-N(2)                   | 111.8(15) |
| C(32)-C(33)-C(34)                            | 124(4)     | C(8)-C(7)-C(6)                   | 122(2)    |
| Ag(2) <sup>i</sup> -Cl(2)-Ag(2)              | 80.65(16)  | C(22)-C(21)-N(4)                 | 105.2(18) |
| C(35)-C(36)-C(37)                            | 110(4)     | C(55)-C(56)-C(57)                | 131(4)    |

|                   |           |                   |           |
|-------------------|-----------|-------------------|-----------|
| C(43)-C(42)-N(4)  | 117.9(19) | C(2)-C(3)-N(1)    | 103.9(17) |
| C(54)-C(55)-C(56) | 126(4)    | C(19)-C(18)-C(17) | 119(3)    |
| C(42)-C(43)-O(1)  | 116(2)    | C(47)-C(48)-C(49) | 126(3)    |
| C(7)-C(6)-C(5)    | 115(3)    | C(61)-C(60)-C(59) | 92(2)     |
| C(42)-C(43)-C(44) | 119(2)    | C(8)-C(9)-C(10)   | 119(3)    |
| C(13)-C(12)-C(11) | 123(3)    | C(71)-C(70)-C(69) | 121(4)    |
| O(1)-C(43)-C(44)  | 105(2)    | C(46)-C(47)-C(48) | 126(3)    |
| C(16)-C(17)-C(18) | 115(3)    | C(66)-C(67)-C(68) | 122(3)    |
| C(21)-C(22)-N(3)  | 110.6(19) | C(50)-C(49)-C(48) | 124(3)    |
| C(14)-C(15)-C(16) | 117(3)    | C(23)-C(24)-C(25) | 107(2)    |

---

Symmetry transformations used to generate equivalent atoms: (i)  $-x+1, -y+1, -z$ ; (ii)  $-x+2, -y+1, -z$ .

**Table S6.** Crystal data and structure refinement for **2**.

---

|                                   |                                                                                                    |
|-----------------------------------|----------------------------------------------------------------------------------------------------|
| Identification code               | 1                                                                                                  |
| Empirical formula                 | C <sub>35</sub> H <sub>68</sub> Au Cl N <sub>2</sub> O                                             |
| Formula weight                    | 765.33                                                                                             |
| Temperature                       | 296(2) K                                                                                           |
| Wavelength                        | 0.71073 Å                                                                                          |
| Crystal system                    | Monoclinic                                                                                         |
| Space group                       | P2(1)/c                                                                                            |
| Unit cell dimensions              | a = 24.165(7) Å    α = 90 °.<br>b = 8.609(3) Å    β = 92.647(7) °.<br>c = 18.260(5) Å    γ = 90 °. |
| Volume                            | 3794.9(19) Å <sup>3</sup>                                                                          |
| Z                                 | 4                                                                                                  |
| Density (calculated)              | 1.340 Mg/m <sup>3</sup>                                                                            |
| Absorption coefficient            | 3.973 mm <sup>-1</sup>                                                                             |
| F(000)                            | 1584                                                                                               |
| Crystal size                      | 0.240 x 0.150 x 0.095 mm <sup>3</sup>                                                              |
| Theta range for data collection   | 0.843 to 25.390°.                                                                                  |
| Index ranges                      | -29<=h<=28, -10<=k<=10, -21<=l<=21                                                                 |
| Reflections collected             | 28778                                                                                              |
| Independent reflections           | 6914 [R(int) = 0.0799]                                                                             |
| Completeness to theta = 25.242°   | 99.9 %                                                                                             |
| Max. and min. transmission        | 0.7036 and 0.4484                                                                                  |
| Refinement method                 | Full-matrix least-squares on F <sup>2</sup>                                                        |
| Data / restraints / parameters    | 6914 / 1 / 361                                                                                     |
| Goodness-of-fit on F <sup>2</sup> | 1.055                                                                                              |
| Final R indices [I>2sigma(I)]     | R1 = 0.0431, wR2 = 0.0962                                                                          |
| R indices (all data)              | R1 = 0.0998, wR2 = 0.1230                                                                          |
| Largest diff. peak and hole       | 1.117 and -0.774 e.Å <sup>-3</sup>                                                                 |

---

<sup>a</sup>  $R_1 = \frac{\sum ||F_o| - |F_c||}{\sum |F_o|}$ .

<sup>b</sup>  $wR_2 = \{\sum w(F_o^2 - F_c^2)^2 / \sum w(F_o^2)^2\}^{1/2}$ .

**Table S7.** Atomic coordinates ( $\times 10^4$ ) and equivalent isotropic displacement parameters ( $\text{\AA}^2 \times 10^3$ ) for **2**.

| Atom  | x        | y        | z       | U(eq) <sup>a</sup> |
|-------|----------|----------|---------|--------------------|
| Au(1) | 4860(1)  | 8436(1)  | 4431(1) | 58(1)              |
| Cl(1) | 4826(1)  | 9619(3)  | 3309(1) | 81(1)              |
| O(1)  | 6170(4)  | 8765(10) | 5776(6) | 159(4)             |
| N(1)  | 5253(2)  | 6491(8)  | 5715(4) | 60(2)              |
| N(2)  | 4453(2)  | 7445(8)  | 5872(4) | 58(2)              |
| C(1)  | 4861(3)  | 7404(9)  | 5391(4) | 50(2)              |
| C(2)  | 5099(4)  | 5952(11) | 6387(5) | 76(3)              |
| C(3)  | 4599(3)  | 6566(10) | 6488(5) | 68(2)              |
| C(4)  | 5805(3)  | 6215(10) | 5448(5) | 66(2)              |
| C(5)  | 6239(3)  | 7207(11) | 5851(6) | 86(3)              |
| C(6)  | 6825(3)  | 6794(10) | 5612(5) | 73(2)              |
| C(7)  | 7280(3)  | 7584(13) | 6062(6) | 90(3)              |
| C(8)  | 7857(3)  | 7112(12) | 5905(6) | 89(3)              |
| C(9)  | 8314(4)  | 7775(13) | 6373(6) | 94(3)              |
| C(10) | 8881(4)  | 7253(14) | 6276(7) | 105(4)             |
| C(11) | 9340(4)  | 7852(14) | 6741(6) | 105(4)             |
| C(12) | 9907(4)  | 7307(14) | 6658(7) | 112(4)             |
| C(13) | 10365(4) | 7869(15) | 7125(7) | 111(4)             |
| C(14) | 10927(4) | 7336(15) | 7040(7) | 118(4)             |
| C(15) | 11397(4) | 7866(16) | 7490(7) | 117(4)             |
| C(16) | 11952(4) | 7353(15) | 7414(7) | 116(4)             |
| C(17) | 12422(4) | 7820(17) | 7841(7) | 125(5)             |
| C(18) | 12989(5) | 7297(16) | 7763(8) | 126(4)             |
| C(19) | 13459(5) | 7820(20) | 8180(8) | 164(7)             |
| C(20) | 3944(3)  | 8344(9)  | 5777(5) | 63(2)              |
| C(21) | 3462(3)  | 7369(11) | 5523(5) | 73(2)              |
| C(22) | 2925(3)  | 8290(10) | 5415(6) | 78(3)              |
| C(23) | 2429(3)  | 7269(11) | 5180(6) | 81(3)              |
| C(24) | 1896(3)  | 8176(11) | 5047(6) | 90(3)              |
| C(25) | 1402(3)  | 7157(11) | 4820(6) | 84(3)              |
| C(26) | 869(4)   | 8065(11) | 4666(6) | 91(3)              |
| C(27) | 374(3)   | 7056(10) | 4441(6) | 82(3)              |

|       |          |          |         |        |
|-------|----------|----------|---------|--------|
| C(28) | -161(3)  | 7962(11) | 4293(6) | 94(3)  |
| C(29) | -653(3)  | 6996(10) | 4070(6) | 79(3)  |
| C(30) | -1181(4) | 7905(11) | 3913(6) | 91(3)  |
| C(31) | -1682(3) | 6930(11) | 3707(6) | 82(3)  |
| C(32) | -2206(4) | 7880(11) | 3570(6) | 86(3)  |
| C(33) | -2718(4) | 6914(10) | 3389(5) | 76(3)  |
| C(34) | -3247(4) | 7848(11) | 3293(6) | 85(3)  |
| C(35) | -3752(4) | 6865(13) | 3127(7) | 115(4) |

---

<sup>a</sup>  $U(\text{eq})$  is defined as one third of the trace of the orthogonalized  $U^{\text{ij}}$  tensor.

**Table S8.** Anisotropic displacement parameters ( $\text{\AA}^2 \times 10^3$ ) for **2**.

| Atom  | U <sub>11</sub> | U <sub>22</sub> | U <sub>33</sub> | U <sub>12</sub> | U <sub>13</sub> | U <sub>23</sub> |
|-------|-----------------|-----------------|-----------------|-----------------|-----------------|-----------------|
| Au(1) | 48(1)           | 62(1)           | 64(1)           | -4(1)           | -7(1)           | 0(1)            |
| Cl(1) | 90(2)           | 86(2)           | 66(1)           | 2(1)            | -7(1)           | -3(1)           |
| O(1)  | 111(7)          | 96(6)           | 268(12)         | -15(7)          | 0(7)            | 13(5)           |
| N(1)  | 36(3)           | 62(4)           | 81(5)           | 0(4)            | -7(3)           | -3(3)           |
| N(2)  | 38(4)           | 61(4)           | 74(4)           | -3(4)           | -5(3)           | -3(3)           |
| C(1)  | 29(4)           | 56(5)           | 65(5)           | -6(4)           | 0(4)            | 6(4)            |
| C(2)  | 67(6)           | 76(6)           | 83(7)           | 15(5)           | -6(5)           | 2(5)            |
| C(3)  | 56(5)           | 69(6)           | 79(6)           | 19(5)           | 4(4)            | 3(5)            |
| C(4)  | 46(5)           | 66(6)           | 87(6)           | -11(4)          | 1(4)            | 18(4)           |
| C(5)  | 34(5)           | 58(5)           | 164(10)         | 13(6)           | -9(5)           | 1(4)            |
| C(6)  | 53(5)           | 75(6)           | 91(6)           | 1(5)            | 1(4)            | 6(5)            |
| C(7)  | 46(5)           | 105(8)          | 119(8)          | -15(7)          | 4(5)            | 9(5)            |
| C(8)  | 45(5)           | 99(8)           | 123(8)          | -6(6)           | -4(5)           | 1(5)            |
| C(9)  | 64(7)           | 106(8)          | 113(8)          | -8(7)           | -4(6)           | 0(6)            |
| C(10) | 60(7)           | 104(9)          | 149(10)         | -12(8)          | 0(7)            | 1(6)            |
| C(11) | 62(7)           | 124(10)         | 129(9)          | -6(8)           | -4(6)           | -2(7)           |
| C(12) | 57(7)           | 108(9)          | 169(11)         | -24(8)          | -7(7)           | -3(6)           |
| C(13) | 57(7)           | 139(11)         | 137(10)         | -10(8)          | -4(6)           | 0(7)            |
| C(14) | 65(7)           | 106(9)          | 179(12)         | -21(9)          | -20(7)          | -4(7)           |
| C(15) | 66(7)           | 151(12)         | 132(10)         | -12(8)          | -14(7)          | 7(7)            |
| C(16) | 64(7)           | 108(9)          | 174(12)         | -35(9)          | -18(7)          | -3(7)           |
| C(17) | 71(8)           | 162(13)         | 139(10)         | -29(9)          | -22(7)          | 15(8)           |
| C(18) | 80(9)           | 128(11)         | 168(12)         | -39(9)          | -7(8)           | 4(8)            |
| C(19) | 98(10)          | 209(17)         | 183(14)         | -85(13)         | -27(10)         | 7(10)           |
| C(20) | 40(4)           | 60(5)           | 88(6)           | -16(5)          | -2(4)           | 10(4)           |
| C(21) | 50(5)           | 67(6)           | 101(7)          | -16(5)          | -6(5)           | -1(5)           |
| C(22) | 43(5)           | 72(6)           | 118(8)          | -20(6)          | -8(5)           | 13(5)           |
| C(23) | 47(5)           | 68(6)           | 127(8)          | -10(6)          | -7(5)           | 7(5)            |
| C(24) | 46(5)           | 79(7)           | 143(9)          | -28(6)          | -16(5)          | 6(5)            |
| C(25) | 49(5)           | 72(6)           | 128(8)          | -16(6)          | -16(5)          | 4(5)            |
| C(26) | 50(5)           | 74(7)           | 149(10)         | -17(6)          | -13(6)          | 7(5)            |
| C(27) | 45(5)           | 72(7)           | 128(8)          | -14(6)          | -13(5)          | 0(5)            |
| C(28) | 52(6)           | 80(7)           | 148(10)         | -15(6)          | -25(6)          | 11(5)           |

|       |       |         |         |        |        |       |
|-------|-------|---------|---------|--------|--------|-------|
| C(29) | 47(5) | 71(7)   | 118(8)  | -18(5) | -14(5) | 4(4)  |
| C(30) | 56(6) | 66(6)   | 150(10) | -13(6) | -16(6) | 6(5)  |
| C(31) | 53(5) | 81(7)   | 110(8)  | -9(5)  | -8(5)  | 2(5)  |
| C(32) | 55(6) | 71(6)   | 129(8)  | -18(6) | -12(5) | 3(5)  |
| C(33) | 61(6) | 76(7)   | 91(7)   | -8(5)  | -6(5)  | 7(5)  |
| C(34) | 56(6) | 78(7)   | 120(8)  | -5(6)  | -11(5) | -1(5) |
| C(35) | 65(7) | 128(11) | 150(11) | 1(8)   | -2(7)  | 8(7)  |

---

**Table S9.** Hydrogen coordinates ( $\times 10^4$ ) and isotropic displacement parameters ( $\text{\AA}^2 \times 10^3$ ) for **2**.

| Atom   | x     | y    | z    | U(eq) |
|--------|-------|------|------|-------|
| H(1A)  | 5864  | 9011 | 5913 | 238   |
| H(2A)  | 5300  | 5297 | 6704 | 91    |
| H(3A)  | 4388  | 6428 | 6896 | 81    |
| H(4A)  | 5803  | 6449 | 4928 | 80    |
| H(4B)  | 5899  | 5127 | 5512 | 80    |
| H(5A)  | 6226  | 6963 | 6374 | 103   |
| H(6A)  | 6876  | 5678 | 5648 | 88    |
| H(6B)  | 6856  | 7083 | 5102 | 88    |
| H(7A)  | 7247  | 8695 | 5986 | 108   |
| H(7B)  | 7223  | 7383 | 6575 | 108   |
| H(8A)  | 7880  | 5989 | 5942 | 107   |
| H(8B)  | 7921  | 7384 | 5401 | 107   |
| H(9A)  | 8307  | 8893 | 6304 | 113   |
| H(9B)  | 8230  | 7580 | 6879 | 113   |
| H(10A) | 8883  | 6132 | 6328 | 125   |
| H(10B) | 8966  | 7475 | 5773 | 125   |
| H(11A) | 9250  | 7654 | 7245 | 126   |
| H(11B) | 9343  | 8970 | 6679 | 126   |
| H(12A) | 9901  | 6185 | 6710 | 134   |
| H(12B) | 9998  | 7522 | 6157 | 134   |
| H(13A) | 10370 | 8991 | 7076 | 133   |
| H(13B) | 10275 | 7647 | 7626 | 133   |
| H(14A) | 10919 | 6214 | 7088 | 141   |
| H(14B) | 11013 | 7554 | 6536 | 141   |
| H(15A) | 11404 | 8988 | 7442 | 140   |
| H(15B) | 11310 | 7650 | 7993 | 140   |
| H(16A) | 11940 | 6230 | 7454 | 139   |
| H(16B) | 12036 | 7577 | 6910 | 139   |
| H(17A) | 12338 | 7595 | 8345 | 150   |
| H(17B) | 12434 | 8943 | 7802 | 150   |
| H(18A) | 12982 | 6179 | 7826 | 151   |
| H(18B) | 13069 | 7480 | 7254 | 151   |



|        |       |      |      |     |
|--------|-------|------|------|-----|
| H(19A) | 13783 | 7299 | 8022 | 246 |
| H(19B) | 13500 | 8923 | 8112 | 246 |
| H(19C) | 13413 | 7608 | 8689 | 246 |
| H(20A) | 3998  | 9162 | 5422 | 75  |
| H(20B) | 3863  | 8830 | 6239 | 75  |
| H(21A) | 3408  | 6555 | 5880 | 87  |
| H(21B) | 3545  | 6877 | 5063 | 87  |
| H(22A) | 2974  | 9080 | 5045 | 94  |
| H(22B) | 2848  | 8812 | 5869 | 94  |
| H(23A) | 2512  | 6720 | 4735 | 97  |
| H(23B) | 2374  | 6499 | 5558 | 97  |
| H(24A) | 1949  | 8940 | 4666 | 108 |
| H(24B) | 1814  | 8732 | 5491 | 108 |
| H(25A) | 1488  | 6581 | 4383 | 100 |
| H(25B) | 1343  | 6411 | 5207 | 100 |
| H(26A) | 784   | 8644 | 5103 | 110 |
| H(26B) | 928   | 8810 | 4279 | 110 |
| H(27A) | 317   | 6306 | 4827 | 98  |
| H(27B) | 458   | 6483 | 4003 | 98  |
| H(28A) | -243  | 8535 | 4732 | 113 |
| H(28B) | -101  | 8715 | 3909 | 113 |
| H(29A) | -717  | 6253 | 4457 | 95  |
| H(29B) | -570  | 6412 | 3634 | 95  |
| H(30A) | -1259 | 8511 | 4344 | 110 |
| H(30B) | -1120 | 8627 | 3517 | 110 |
| H(31A) | -1741 | 6193 | 4098 | 98  |
| H(31B) | -1610 | 6343 | 3268 | 98  |
| H(32A) | -2268 | 8498 | 4003 | 103 |
| H(32B) | -2150 | 8591 | 3168 | 103 |
| H(33A) | -2663 | 6341 | 2941 | 92  |
| H(33B) | -2761 | 6163 | 3779 | 92  |
| H(34A) | -3300 | 8435 | 3738 | 102 |
| H(34B) | -3208 | 8585 | 2897 | 102 |
| H(35A) | -4072 | 7521 | 3073 | 172 |
| H(35B) | -3707 | 6299 | 2681 | 172 |
| H(35C) | -3799 | 6148 | 3522 | 172 |

---

**Table S10.** Bond lengths [Å] and angles [°] for **2**.

| Bond lengths      |           |                   |           |
|-------------------|-----------|-------------------|-----------|
| Au(1)-C(1)        | 1.965(8)  | C(14)-C(15)       | 1.444(14) |
| Au(1)-Cl(1)       | 2.286(2)  | C(15)-C(16)       | 1.426(13) |
| O(1)-C(5)         | 1.359(11) | C(16)-C(17)       | 1.407(13) |
| N(1)-C(1)         | 1.347(9)  | C(17)-C(18)       | 1.455(14) |
| N(1)-C(2)         | 1.379(10) | C(18)-C(19)       | 1.412(15) |
| N(1)-C(4)         | 1.461(9)  | C(20)-C(21)       | 1.492(10) |
| N(2)-C(1)         | 1.351(9)  | C(21)-C(22)       | 1.524(11) |
| N(2)-C(3)         | 1.387(10) | C(22)-C(23)       | 1.533(11) |
| N(2)-C(20)        | 1.456(9)  | C(23)-C(24)       | 1.516(11) |
| C(2)-C(3)         | 1.339(11) | C(24)-C(25)       | 1.524(11) |
| C(4)-C(5)         | 1.517(12) | C(25)-C(26)       | 1.523(11) |
| C(5)-C(6)         | 1.543(11) | C(26)-C(27)       | 1.518(11) |
| C(6)-C(7)         | 1.504(12) | C(27)-C(28)       | 1.524(11) |
| C(7)-C(8)         | 1.493(11) | C(28)-C(29)       | 1.494(11) |
| C(8)-C(9)         | 1.478(12) | C(29)-C(30)       | 1.512(11) |
| C(9)-C(10)        | 1.461(13) | C(30)-C(31)       | 1.506(12) |
| C(10)-C(11)       | 1.459(13) | C(31)-C(32)       | 1.519(11) |
| C(11)-C(12)       | 1.463(13) | C(32)-C(33)       | 1.515(12) |
| C(12)-C(13)       | 1.449(13) | C(33)-C(34)       | 1.513(11) |
| C(13)-C(14)       | 1.449(13) | C(34)-C(35)       | 1.504(12) |
| Angles            |           |                   |           |
| C(1)-Au(1)-Cl(1)  | 178.0(2)  | C(13)-C(12)-C(11) | 121.8(10) |
| C(1)-N(1)-C(2)    | 111.9(7)  | C(14)-C(13)-C(12) | 121.8(11) |
| C(1)-N(1)-C(4)    | 125.7(7)  | C(15)-C(14)-C(13) | 123.7(11) |
| C(2)-N(1)-C(4)    | 122.1(7)  | C(16)-C(15)-C(14) | 124.4(11) |
| C(1)-N(2)-C(3)    | 110.3(7)  | C(17)-C(16)-C(15) | 126.6(11) |
| C(1)-N(2)-C(20)   | 125.0(7)  | C(16)-C(17)-C(18) | 126.6(12) |
| C(3)-N(2)-C(20)   | 124.7(7)  | C(19)-C(18)-C(17) | 125.8(12) |
| N(1)-C(1)-N(2)    | 104.5(7)  | N(2)-C(20)-C(21)  | 112.4(7)  |
| N(1)-C(1)-Au(1)   | 128.8(5)  | C(20)-C(21)-C(22) | 113.3(7)  |
| N(2)-C(1)-Au(1)   | 126.7(6)  | C(21)-C(22)-C(23) | 112.8(7)  |
| C(3)-C(2)-N(1)    | 105.8(8)  | C(24)-C(23)-C(22) | 113.4(7)  |
| C(2)-C(3)-N(2)    | 107.5(8)  | C(23)-C(24)-C(25) | 113.3(8)  |
| N(1)-C(4)-C(5)    | 111.6(7)  | C(26)-C(25)-C(24) | 113.6(8)  |
| O(1)-C(5)-C(4)    | 115.3(8)  | C(27)-C(26)-C(25) | 113.9(7)  |
| O(1)-C(5)-C(6)    | 108.0(8)  | C(26)-C(27)-C(28) | 113.9(8)  |
| C(4)-C(5)-C(6)    | 110.9(8)  | C(29)-C(28)-C(27) | 115.0(8)  |
| C(7)-C(6)-C(5)    | 113.5(8)  | C(28)-C(29)-C(30) | 114.7(7)  |
| C(8)-C(7)-C(6)    | 116.0(8)  | C(31)-C(30)-C(29) | 114.8(8)  |
| C(9)-C(8)-C(7)    | 117.6(9)  | C(30)-C(31)-C(32) | 113.3(8)  |
| C(10)-C(9)-C(8)   | 119.4(9)  | C(33)-C(32)-C(31) | 114.0(8)  |
| C(11)-C(10)-C(9)  | 120.9(10) | C(34)-C(33)-C(32) | 114.3(8)  |
| C(10)-C(11)-C(12) | 121.1(10) | C(35)-C(34)-C(33) | 113.4(8)  |

---

Symmetry transformations used to generate equivalent atoms:
